# Supplementary material for: H-Beta Zeolite as Catalyst for the Conversion of Carbohydrates into 5-Hydroxymethylfurfural: The Role of Calcination Temperature
Source: MDPI journal article supplement (doi:10.3390/catal14040248), 2024-04-08
Supplement: s1 [file s1]

## Supporting Information

# H-Beta Zeolite as Catalyst for the Conversion of Carbohydrates into 5-Hydroxymethylfurfural: The Role of Calcination Temperature

Xinyi Xing <sup>1,2</sup>, Wannli Liu <sup>2</sup>, Siquan Xu <sup>2</sup> and Jianxiu Hao <sup>1,2,\*</sup>

<sup>1</sup> School of Chemistry & Chemical Engineering, Suzhou University, Suzhou 234000, China; xingxinyi0206@163.com

<sup>2</sup> School of Forestry and Landscape Architecture, Anhui Agricultural University, Hefei 230031, China; liuwanni817@163.com (W.L.); siquanxu@ahau.edu.cn (S.X.)

\* Correspondence: haojx2021@ahszu.edu.cn

**Table S1.** Performance comparison of catalysts for the isomerization of glucose to fructose.

| Catalyst     | Lewis acid sites ( $\mu\text{mol/g}$ ) | Reaction temperature ( $^{\circ}\text{C}$ ) | Reaction time (h) | Fructose selectivity (%) |
|--------------|----------------------------------------|---------------------------------------------|-------------------|--------------------------|
| H-Beta       | 259                                    | 120                                         | 2                 | 17                       |
|              |                                        | 130                                         | 2                 | 29                       |
|              |                                        | 140                                         | 2                 | 25                       |
|              |                                        | 130                                         | 1                 | 16                       |
|              |                                        | 130                                         | 3                 | 25                       |
| H-Beta(350)  | 228                                    | 120                                         | 2                 | 14                       |
|              |                                        | 130                                         | 2                 | 24                       |
|              |                                        | 140                                         | 2                 | 21                       |
|              |                                        | 130                                         | 1                 | 15                       |
|              |                                        | 130                                         | 3                 | 22                       |
| H-Beta(550)  | 153                                    | 130                                         | 2                 | 13                       |
|              |                                        | 140                                         | 2                 | 19                       |
|              |                                        | 150                                         | 2                 | 14                       |
|              |                                        | 140                                         | 1                 | 11                       |
|              |                                        | 140                                         | 3                 | 12                       |
| H-Beta(750)  | 90                                     | 130                                         | 2                 | 9                        |
|              |                                        | 140                                         | 2                 | 15                       |
|              |                                        | 150                                         | 2                 | 13                       |
|              |                                        | 140                                         | 1                 | 10                       |
|              |                                        | 140                                         | 3                 | 11                       |
| H-Beta(1000) | 70                                     | 130                                         | 2                 | 6                        |
|              |                                        | 140                                         | 2                 | 10                       |
|              |                                        | 150                                         | 2                 | 11                       |
|              |                                        | 150                                         | 1                 | 7                        |
|              |                                        | 150                                         | 3                 | 9                        |

Reaction condition: glucose (100 mg), catalyst (30 mg),  $\text{H}_2\text{O}$  (3 mL).

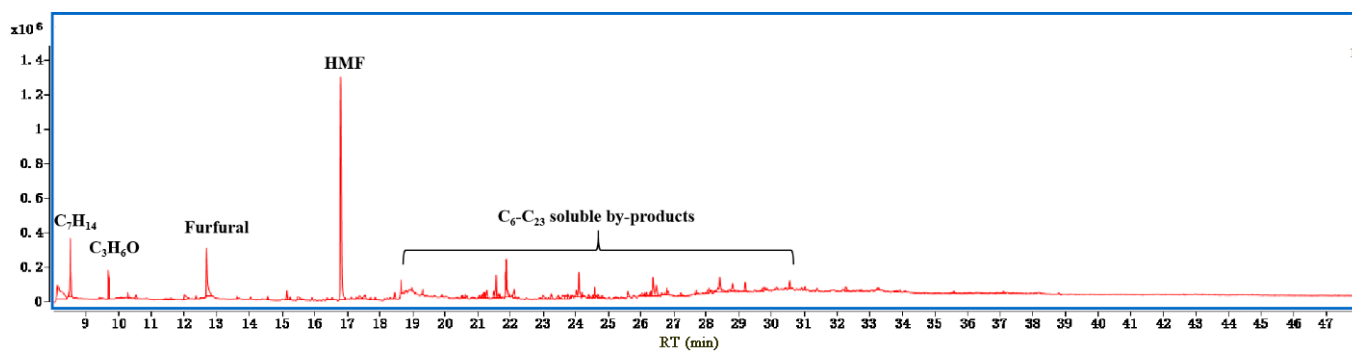

**Figure S1.** GC-MS analysis of the THF phase recovered after the reaction.

Reaction condition: glucose (100 mg), H-Beta zeolite catalyst (30 mg), NaCl (20 mg), reaction

H<sub>2</sub>O (1 mL), THF (4 mL), temperature (170 °C), reaction time (2 h).
